# Supplementary material
Source: MDPI journal article supplement (https://www.mdpi.com/2073-4395/12/2/486)
Supplement: s1 [file s1]

# **How agriculture, connectivity and water management can affect water quality of a Mediterranean coastal wetland**

Lucía Vera-Herrera<sup>1,\*</sup>, Susana Romo<sup>2</sup> and Juan Soria<sup>3</sup>

<sup>1</sup> Food and Environmental Safety Research Group, Desertification Research Centre—CIDE (CSIC-UV-GV). University of Valencia (SAMA-UV), Moncada-Naquera Road, Km 4.5, 46113 Moncada, Spain.

<sup>2</sup> Department of Microbiology and Ecology. University of Valencia, Campus Burjassot, 46100 Burjassot, Valencia, Spain; [susana.romo@uv.es](mailto:susana.romo@uv.es) (S.R.)

<sup>3</sup> Campus Paterna, Cavanilles Institute of Biodiversity & Evolutionary Biology (ICBiBE), University of Valencia, 46980 Paterna, Spain; [juan.soria@uv.es](mailto:juan.soria@uv.es) (J.S.)

\*Corresponding author: [vehelu@uv.es](mailto:vehelu@uv.es) (L.V.-H.)

L. Vera-Herrera ORCID: 0000-0002-1028-4997

J. Soria ORCID: 0000-0001-5249-8590

## **Supplementary material**

Number of pages: 10

Number of tables: 3

Number of figures: 4

**Table S1.** Classification of sampling points according to their corresponding aquatic habitat, the agricultural activity carried out in its vicinity, the irrigation zone and their water body typology. Water body typology established according to the Water Framework Directive [24] and the Decret 1/2016 (reference: BOE-A-2016-439).

| Sample code | Aquatic habitat           | Type of cultivation    | Irrigation zones | Water body typology | Type designation                                                                             |
|-------------|---------------------------|------------------------|------------------|---------------------|----------------------------------------------------------------------------------------------|
| W-1         | Turia River               | Mosaic cultivation     | Turia River      | R- T14              | Mediterranean low altitude axes                                                              |
| W-2         | Turia River               | Mosaic cultivation     | Turia River      | R- T14              | Mediterranean low altitude axes                                                              |
| W-3         | Irrigation channel        | Traditional orchard    | Huerta Oeste     | R-T14-HM            | Low altitude Mediterranean axes. Heavily modified.                                           |
| W-5         | Irrigation channel        | Mosaic cultivation     | Huerta Oeste     | R-T14-AR            | Low altitude Mediterranean axes. Artificial.                                                 |
| W-6         | Irrigation channel - WWTP | Mosaic cultivation     | Huerta Oeste     | R-T14-AR            | Low altitude Mediterranean axes. Artificial.                                                 |
| W-7         | Irrigation channel        | Traditional orchard    | Favara           | R-T14-AR            | Low altitude Mediterranean axes. Artificial.                                                 |
| W-8         | Irrigation channel        | Traditional orchard    | Favara           | R-T14-AR            | Low altitude Mediterranean axes. Artificial.                                                 |
| W-9         | Irrigation channel        | Rice cultivation       | Oro              | L-T28-HM            | Coastal lagoons without marine influence. Heavily modified by artificial level fluctuations. |
| W-10        | Irrigation channel        | Rice cultivation       | Oro              | L-T28-HM            | Coastal lagoons without marine influence. Heavily modified by artificial level fluctuations. |
| W-11        | Irrigation channel        | Fruit tree cultivation | ARJ              | R-T17               | Large axes in a Mediterranean environment                                                    |
| W-13        | Irrigation channel        | Rice cultivation       | Favara           | L-T28-HM            | Coastal lagoons without marine influence. Heavily modified by artificial level fluctuations. |
| W-14        | Irrigation channel        | Rice cultivation       | Oro              | L-T28-HM            | Coastal lagoons without marine influence. Heavily modified by artificial level fluctuations. |
| W-15        | Irrigation channel        | Rice cultivation       | Favara           | L-T28-HM            | Coastal lagoons without marine influence. Heavily modified by artificial level fluctuations. |
| W-16        | Irrigation channel        | Rice cultivation       | Favara           | L-T28-HM            | Coastal lagoons without marine influence. Heavily modified by artificial level fluctuations. |
| W-17        | Irrigation channel        | Rice cultivation       | Favara           | L-T28-HM            | Coastal lagoons without marine influence. Heavily modified by artificial level fluctuations. |
| W-18        | Irrigation channel        | Rice cultivation       | Favara           | L-T28-HM            | Coastal lagoons without marine influence. Heavily modified by artificial level fluctuations. |
| W-20        | Lake                      | Lake                   | Lake             | L-T28-HM            | Coastal lagoons without marine influence. Heavily modified by artificial level fluctuations. |
| W-21        | Outlet channel (Pujol)    | Lake                   | Lake             | L-T28-HM            | Coastal lagoons without marine influence. Heavily modified by artificial level fluctuations. |

|      |                             |                        |             |          |                                                                                              |
|------|-----------------------------|------------------------|-------------|----------|----------------------------------------------------------------------------------------------|
| W-23 | Irrigation channel          | Rice cultivation       | ARJ         | L-T28-HM | Coastal lagoons without marine influence. Heavily modified by artificial level fluctuations. |
| W-24 | Irrigation channel          | Mosaic cultivation     | ARJ         | L-T28-HM | Coastal lagoons without marine influence. Heavily modified by artificial level fluctuations. |
| W-25 | Lake                        | Lake                   | Lake        | L-T28-HM | Coastal lagoons without marine influence. Heavily modified by artificial level fluctuations. |
| W-26 | Lake                        | Lake                   | Lake        | L-T28-HM | Coastal lagoons without marine influence. Heavily modified by artificial level fluctuations. |
| W-28 | Lake                        | Lake                   | Lake        | L-T28-HM | Coastal lagoons without marine influence. Heavily modified by artificial level fluctuations. |
| W-29 | Irrigation channel          | Rice cultivation       | Lake        | L-T28-HM | Coastal lagoons without marine influence. Heavily modified by artificial level fluctuations. |
| W-30 | Lake                        | Lake                   | Lake        | L-T28-HM | Coastal lagoons without marine influence. Heavily modified by artificial level fluctuations. |
| W-31 | Irrigation channel          | Rice cultivation       | Lake        | L-T28-HM | Coastal lagoons without marine influence. Heavily modified by artificial level fluctuations. |
| W-32 | Outlet channel (Perellonet) | Lake                   | Lake        | L-T28-HM | Coastal lagoons without marine influence. Heavily modified by artificial level fluctuations. |
| W-33 | Irrigation channel          | Rice cultivation       | Lake        | L-T28-HM | Coastal lagoons without marine influence. Heavily modified by artificial level fluctuations. |
| W-34 | Irrigation channel          | Rice cultivation       | ARJ         | L-T28-HM | Coastal lagoons without marine influence. Heavily modified by artificial level fluctuations. |
| W-35 | Irrigation channel          | Rice cultivation       | Sueca       | L-T28-HM | Coastal lagoons without marine influence. Heavily modified by artificial level fluctuations. |
| W-36 | Irrigation channel          | Fruit tree cultivation | ARJ         | R-T17    | Large axes in a Mediterranean environment                                                    |
| W-37 | Outlet channel (Perelló)    | Lake                   | Lake        | L-T28-HM | Coastal lagoons without marine influence. Heavily modified by artificial level fluctuations. |
| W-38 | Magro River                 | Fruit tree cultivation | Magro River | R-T17    | Large axes in a Mediterranean environment                                                    |
| W-39 | Irrigation channel          | Fruit tree cultivation | Magro River | R-T17    | Large axes in a Mediterranean environment                                                    |
| W-40 | Irrigation channel          | Fruit tree cultivation | Magro River | R-T17    | Large axes in a Mediterranean environment                                                    |
| W-41 | Irrigation channel          | Fruit tree cultivation | ARJ         | L-T28-HM | Coastal lagoons without marine influence. Heavily modified by artificial level fluctuations. |
| W-42 | Irrigation channel          | Rice cultivation       | Sueca       | L-T28-HM | Coastal lagoons without marine influence. Heavily modified by artificial level fluctuations. |
| W-43 | Irrigation channel          | Rice cultivation       | Sueca       | L-T28-HM | Coastal lagoons without marine influence. Heavily modified by artificial level fluctuations. |
| W-44 | Irrigation channel          | Rice cultivation       | Sueca       | L-T28-HM | Coastal lagoons without marine influence. Heavily modified by artificial level fluctuations. |

|      |                    |                        |         |          |                                                                                              |
|------|--------------------|------------------------|---------|----------|----------------------------------------------------------------------------------------------|
| W-45 | Irrigation channel | Rice cultivation       | Sueca   | L-T28-HM | Coastal lagoons without marine influence. Heavily modified by artificial level fluctuations. |
| W-46 | Irrigation channel | Rice cultivation       | Sueca   | L-T28-HM | Coastal lagoons without marine influence. Heavily modified by artificial level fluctuations. |
| W-48 | Irrigation channel | Fruit tree cultivation | ARJ     | R-T17    | Large axes in a Mediterranean environment                                                    |
| W-49 | Irrigation channel | Fruit tree cultivation | ARJ     | R-T17    | Large axes in a Mediterranean environment                                                    |
| W-50 | Irrigation channel | Fruit tree cultivation | ARJ     | L-T28-HM | Coastal lagoons without marine influence. Heavily modified by artificial level fluctuations. |
| W-51 | Irrigation channel | Rice cultivation       | Sueca   | L-T28-HM | Coastal lagoons without marine influence. Heavily modified by artificial level fluctuations. |
| W-52 | Irrigation channel | Rice cultivation       | Cullera | L-T28-HM | Coastal lagoons without marine influence. Heavily modified by artificial level fluctuations. |
| W-53 | Irrigation channel | Fruit tree cultivation | Cullera | L-T28-HM | Coastal lagoons without marine influence. Heavily modified by artificial level fluctuations. |
| W-54 | Irrigation channel | Rice cultivation       | Sueca   | R-T17    | Large axes in a Mediterranean environment                                                    |
| W-55 | Irrigation channel | Fruit tree cultivation | Sueca   | R-T17    | Large axes in a Mediterranean environment                                                    |
| W-56 | Jucar River        | Fruit tree cultivation | ARJ     | R-T17    | Large axes in a Mediterranean environment                                                    |
| W-57 | Irrigation channel | Rice cultivation       | ARJ     | L-T28-HM | Coastal lagoons without marine influence. Heavily modified by artificial level fluctuations. |

---

**Table S2.** Limit of detection (LOD) and limit of quantification (LOQ) of the main physico-chemical and biological variables determined in the laboratory, studied in the water bodies during rice cultivation (May to October 2019).

| Variable                          | Unit                | LOD    | LOQ    |
|-----------------------------------|---------------------|--------|--------|
| Organic matter                    | mg L <sup>-1</sup>  | 0.0002 | 0.0002 |
| Ammonium nitrogen                 | mgN L <sup>-1</sup> | 0.0003 | 0.001  |
| Nitrite nitrogen                  | mgN L <sup>-1</sup> | 0.0003 | 0.001  |
| Nitrate nitrogen                  | mgN L <sup>-1</sup> | 0.0003 | 0.001  |
| Dissolved nitrogen (DN)           | mgN L <sup>-1</sup> | 0.05   | 0.05   |
| Total nitrogen (TN)               | mgN L <sup>-1</sup> | 0.05   | 0.05   |
| Soluble reactive phosphorus (SRP) | mgP L <sup>-1</sup> | 0.0001 | 0.0001 |
| Total phosphorus (TP)             | mgP L <sup>-1</sup> | 0.0002 | 0.0002 |
| Chlorophyll-a (Chl-a)             | mg m <sup>-3</sup>  | 0.003  | 1.0    |
| Carotene                          | mg m <sup>-3</sup>  | 0.003  | 1.0    |
| Inorganic carbon (TIC)            | mgC L <sup>-1</sup> | 0.05   | 0.05   |
| Dissolved organic carbon (DOC)    | mgC L <sup>-1</sup> | 0.05   | 0.05   |
| Total organic carbon (TOC)        | mgC L <sup>-1</sup> | 0.05   | 0.05   |

**Table S3.** Mean, standard error, maximum and minimum values of the physico-chemical and biological variables studied in water bodies for the two sampling campaigns at the beginning and the end of rice cultivation (see *Section 2* for more details).

| Variable                                                    | First sampling campaign (May - June 2019) |       |         |         | Second sampling campaign (September - October 2019) |       |         |         |
|-------------------------------------------------------------|-------------------------------------------|-------|---------|---------|-----------------------------------------------------|-------|---------|---------|
|                                                             | Mean                                      | SE    | Maximum | Minimum | Mean                                                | SE    | Maximum | Minimum |
| Turbidity (NTU)                                             | 12.93                                     | 1.91  | 77.30   | 0.70    | 9.97                                                | 1.27  | 38.40   | 0.50    |
| pH                                                          | 7.52                                      | 0.04  | 8.40    | 7.00    | 8.23                                                | 0.06  | 10.00   | 7.40    |
| Conductivity ( $\mu\text{S cm}^{-1}$ )                      | 1668.6                                    | 75.8  | 3900.0  | 956.0   | 1426.9                                              | 113.6 | 6372.0  | 307.0   |
| Organic matter ( $\text{mg L}^{-1}$ )                       | 1.187                                     | 0.124 | 3.449   | 0.003   | 1.224                                               | 0.087 | 2.760   | 0.382   |
| Ammonium ( $\text{mgN L}^{-1}$ )                            | 0.669                                     | 0.179 | 7.588   | 0.002   | 0.404                                               | 0.165 | 7.357   | 0.002   |
| Nitrite ( $\text{mgN L}^{-1}$ )                             | 0.169                                     | 0.026 | 0.703   | 0.002   | 0.099                                               | 0.022 | 0.709   | 0.001   |
| Nitrate ( $\text{mgN L}^{-1}$ )                             | 1.910                                     | 0.199 | 4.421   | 0.013   | 2.061                                               | 0.232 | 5.471   | 0.013   |
| Dissolved inorganic nitrogen (DIN; $\text{mgN L}^{-1}$ )    | 2.747                                     | 0.308 | 10.233  | 0.043   | 2.565                                               | 0.316 | 9.864   | 0.066   |
| Dissolved organic nitrogen (DON; $\text{mgN L}^{-1}$ )      | 3.345                                     | 0.794 | 26.736  | 0.020   | 2.358                                               | 0.747 | 25.410  | 0.000   |
| Dissolved nitrogen (DN; $\text{mgN L}^{-1}$ )               | 6.09                                      | 0.77  | 27.54   | 0.40    | 4.92                                                | 0.76  | 25.48   | 0.79    |
| Total nitrogen (TN; $\text{mgN L}^{-1}$ )                   | 6.95                                      | 0.78  | 28.94   | 1.09    | 5.43                                                | 0.76  | 25.99   | 0.92    |
| Soluble reactive phosphorus (SRP; $\text{mgP L}^{-1}$ )     | 0.054                                     | 0.014 | 0.621   | 0.001   | 0.093                                               | 0.047 | 2.281   | 0.001   |
| Particulate phosphorus (Ppart; $\text{mgP L}^{-1}$ )        | 0.199                                     | 0.084 | 3.940   | 0.0001  | 0.198                                               | 0.054 | 2.451   | 0.012   |
| Total phosphorus (TP; $\text{mgP L}^{-1}$ )                 | 0.253                                     | 0.082 | 4.056   | 0.003   | 0.106                                               | 0.027 | 1.328   | 0.007   |
| Chlorophyll- <i>a</i> (Chl- <i>a</i> ; $\text{mg m}^{-3}$ ) | 29.0                                      | 5.1   | 117.1   | 1.0     | 21.4                                                | 3.4   | 92.0    | 1.0     |
| Carotene ( $\text{mg m}^{-3}$ )                             | 12.8                                      | 2.3   | 51.5    | 1.0     | 9.5                                                 | 1.6   | 36.2    | 1.0     |
| Inorganic carbon (TIC; $\text{mgC L}^{-1}$ )                | 34.64                                     | 1.79  | 58.43   | 3.73    | 24.25                                               | 2.06  | 52.58   | 4.08    |
| Dissolved organic carbon (DOC; $\text{mgC L}^{-1}$ )        | 5.31                                      | 0.57  | 17.22   | 1.21    | 4.92                                                | 0.45  | 14.23   | 1.25    |
| Total organic carbon (TOC; $\text{mgC L}^{-1}$ )            | 6.18                                      | 0.68  | 17.74   | 1.32    | 5.55                                                | 0.52  | 14.36   | 1.30    |
| Total carbon (TC; $\text{mgC L}^{-1}$ )                     | 40.82                                     | 1.47  | 63.96   | 20.09   | 29.81                                               | 2.21  | 60.22   | 7.36    |
| Alkalinity ( $\text{meq L}^{-1}$ )                          | 2.89                                      | 0.15  | 4.87    | 0.31    | 2.02                                                | 0.17  | 4.38    | 0.34    |

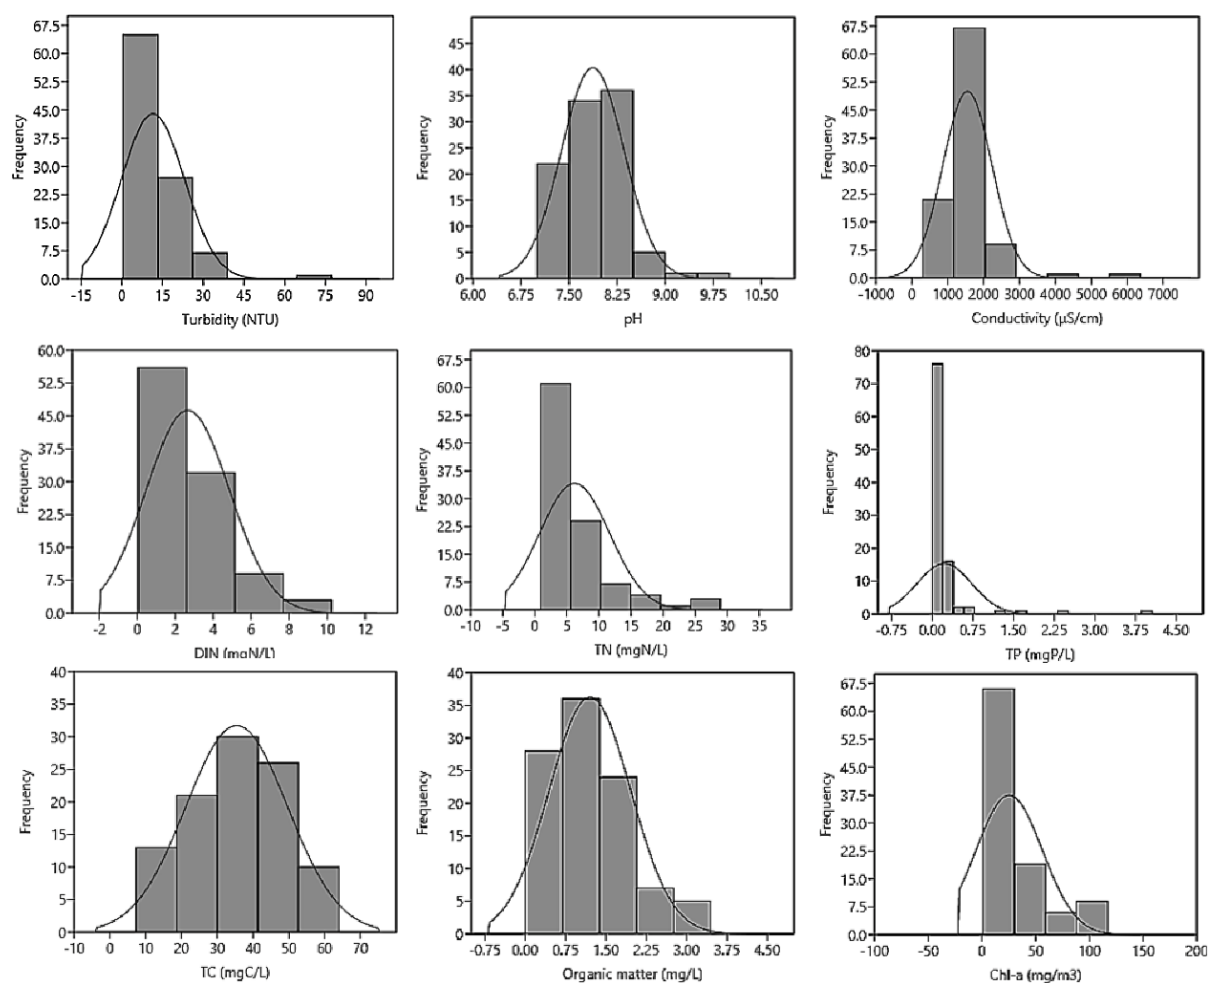

**Figure S1.** Frequency distribution and adjustment curves of turbidity, pH, conductivity, total nutrients, organic matter and phytoplactonic chlorophyll for the values of the two sampling periods.

### A) Chlorophyll correlated variables

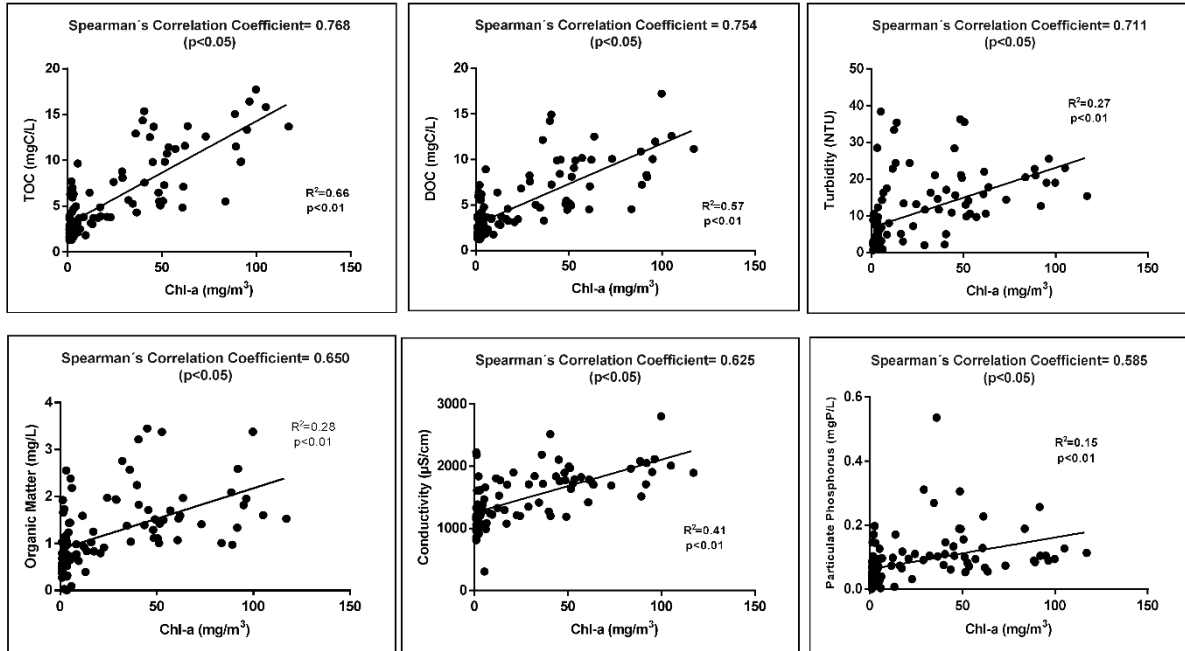

### B) Nitrogen correlated variables

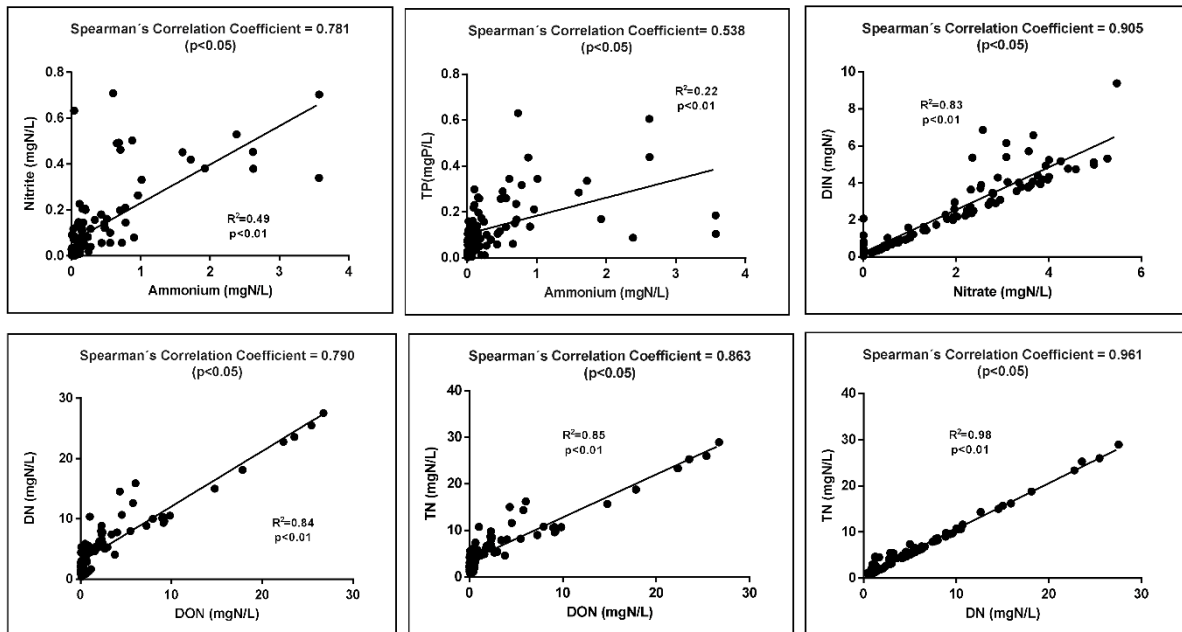

**Figure S2.** Significant linear relationships ( $p < 0.01$ ) of the study variables related to chlorophyll (A) and nitrogen (B), together with the values of Spearman's correlation coefficient.



### A) Phosphorus correlated variables

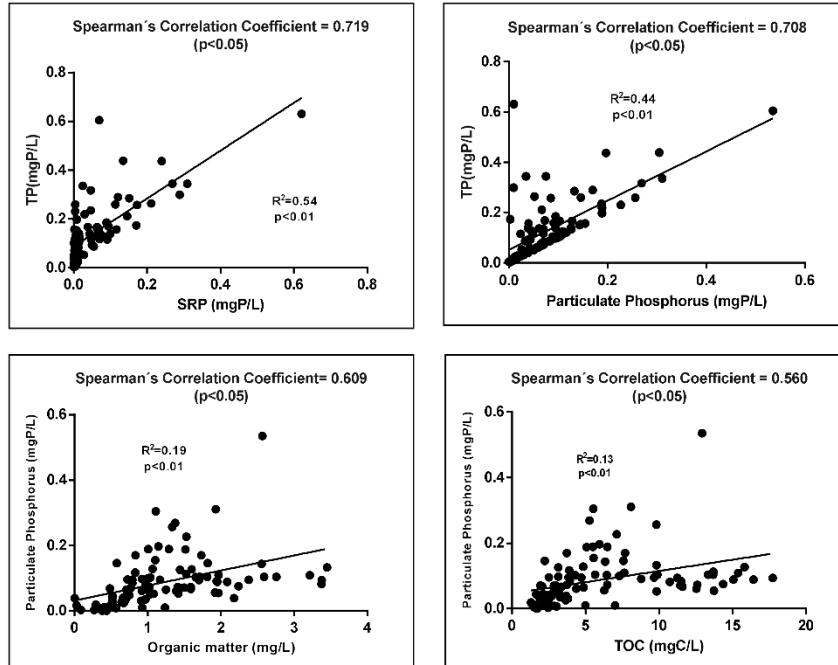

### B) Carbon correlated variables

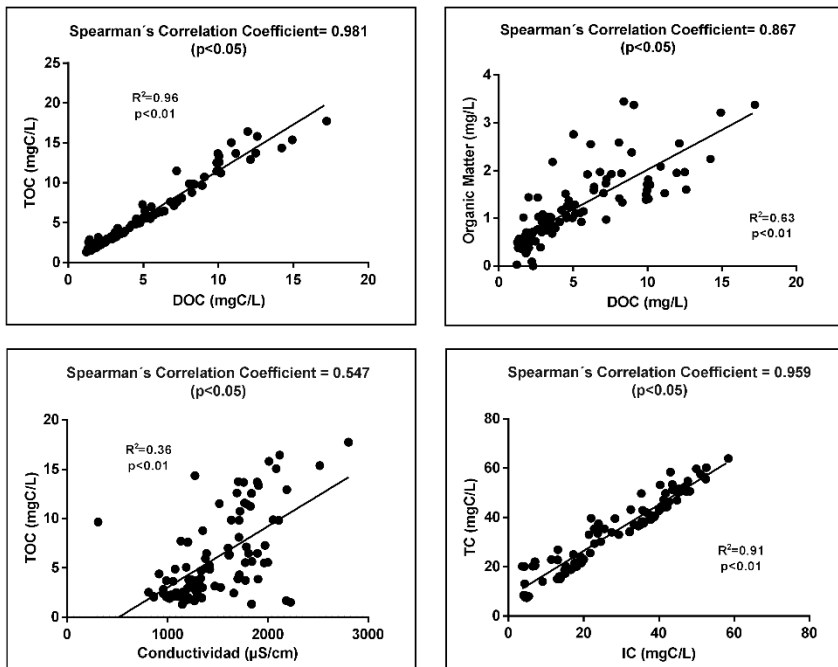

**Figure S3.** Significant linear relationships ( $p < 0.01$ ) of the study variables related to phosphorus (A) and carbon (B), together with the value of Spearman's correlation coefficient.

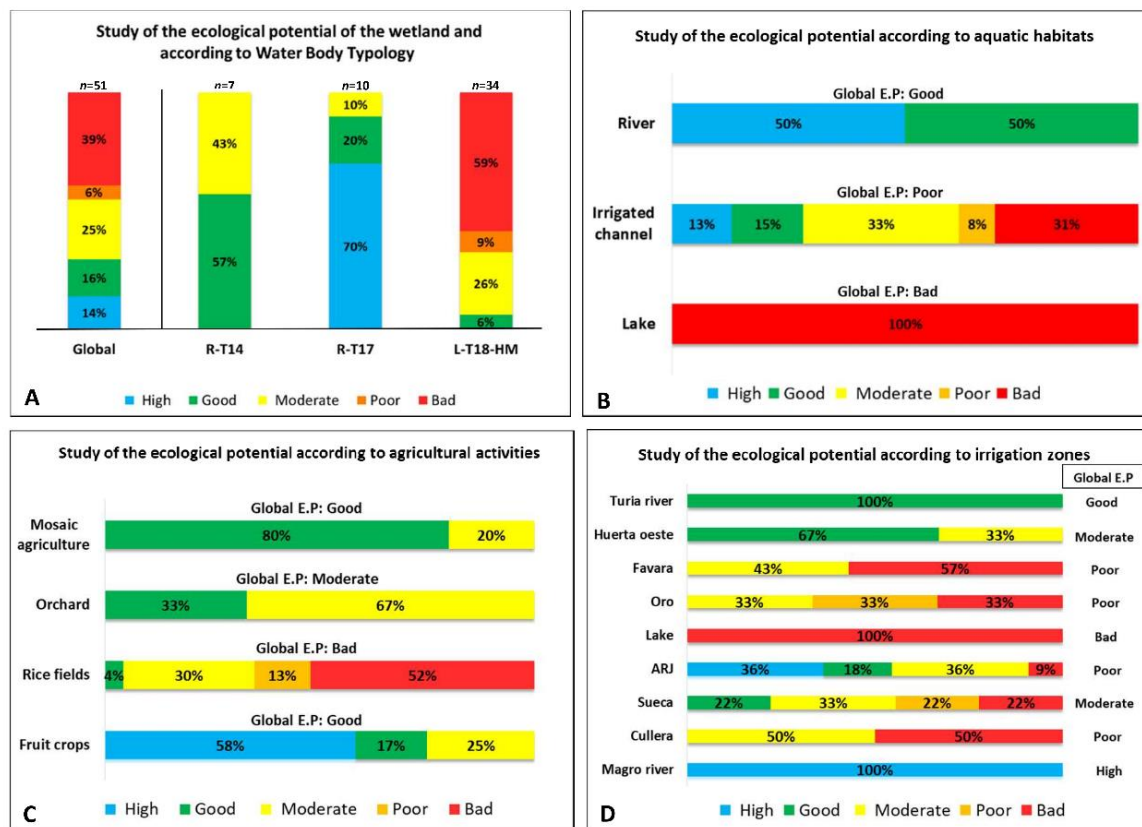

**Figure S4.** Percentages of the ecological potential for the different aquatic ecosystems and typologies [24,64]. Results for (A) the global study of the wetland and for the distinct water body typologies, (B) considering aquatic habitats, (C) according to agricultural activities, (D) according to irrigation zones.
